# Supplementary material
Source: PubMed Central journal article supplement (PMC4957033)
Supplement: 10.1074_M116.719179_jbc.M116.719179-1.pdf [file 10.1074_M116.719179_jbc.M116.719179-1.pdf]

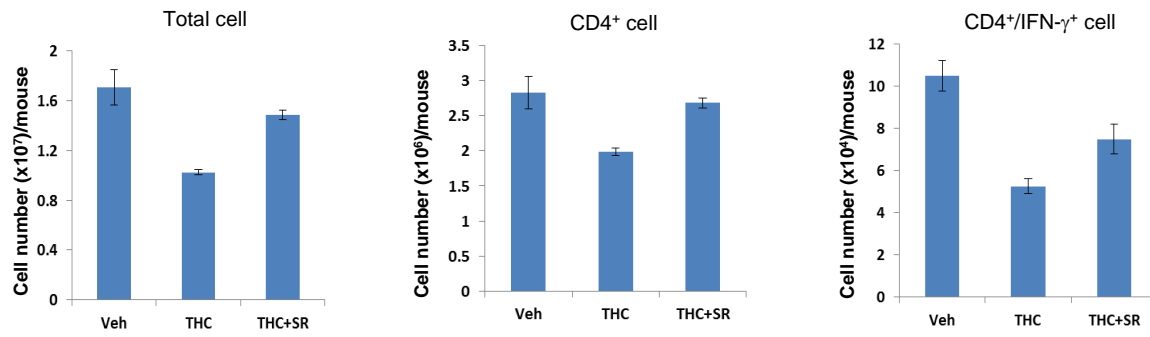

**Supplement Figure 1. Effect of THC on cell population in activated lymph node**

C57BL/6J mice were treated with vehicle, THC or THC+SR144528 as described in “Experimental Procedure”. The day after SEB challenge, draining popliteal lymph node cells from vehicle (n=4), THC (n=7) or THC+SR (n=4) treated mice were harvested and analyzed. T cell population in these 3 groups was analyzed by flow cytometry using CD3 and CD4 staining and total cell numbers were calculated and depicted. CD4<sup>+</sup> T cells stained intracellularly for IFN-γ were similarly analyzed by flow cytometry and total number of positive cells were depicted.
